# Supplementary material for: Multiple Job Holding, Job Changes, and Associations with Gestational Diabetes and Pregnancy-Related Hypertension in the National Birth Defects Prevention Study
Source: MDPI journal article supplement (doi:10.3390/ijerph21050619), 2024-05-14
Supplement: s1 [file s1]

# Multiple Job Holding, Job Changes, and Associations with Gestational Diabetes and Pregnancy-Related Hypertension in the National Birth Defects Prevention Study

Amel Omari <sup>1,2,\*</sup>, Miriam R. Siegel <sup>1</sup>, Carissa M. Rocheleau <sup>1</sup>, Kaori Fujishiro <sup>1</sup>, Kristen Van Buren <sup>1</sup>, Dallas Shi <sup>1,2</sup>, A.J. Agopian <sup>3</sup>, Suzanne M. Gilboa <sup>4</sup> and Paul A. Romitti <sup>5</sup>

<sup>1</sup> Division of Field Studies and Engineering, National Institute for Occupational Safety and Health, Cincinnati, OH 45213, USA

<sup>2</sup> Epidemic Intelligence Service Officer, Centers for Disease Control and Prevention (CDC), Atlanta, GA 30329, USA

<sup>3</sup> Department of Epidemiology, Human Genetics, and Environmental Sciences, UTHealth School of Public Health, Houston, TX 77030, USA

<sup>4</sup> Division of Birth Defects and Infant Disorders, National Center on Birth Defects and Developmental Disabilities, Centers for Disease Control and Prevention (CDC), Atlanta, GA 30329, USA

<sup>5</sup> Department of Epidemiology, College of Public Health, The University of Iowa, Iowa City, IA 52242, USA

\* Correspondence: [rlx9@cdc.gov](mailto:rlx9@cdc.gov)

**Table S1.** Associations between gestational diabetes or pregnancy-related hypertension and working pattern, stratified by prior-year household income and adjusted for maternal age and education, National Birth Defects Prevention Study, 1997-2011. Income cut points are set at \$10,000 and \$50,000.\*

|                                    | Single job holders |           |        | Job changers        |                     |                     | Multiple job holders               |                                   |                                   |
|------------------------------------|--------------------|-----------|--------|---------------------|---------------------|---------------------|------------------------------------|-----------------------------------|-----------------------------------|
| Prior-year household income strata | <\$10K             | \$10K-50K | >\$50K | <\$10K              | \$10K-50K           | >\$50K              | <\$10K                             | \$10K-50K                         | >\$50K                            |
| Gestational diabetes               | n=887              | n=2712    | n=2733 | n=126               | n=282               | n=97                | n=67                               | n=322                             | n=227                             |
| aOR (95% CI)                       | ref.               | ref.      | ref.   | 1.05<br>(0.46-2.39) | 0.67<br>(0.31-1.46) | 0.28<br>(0.04-2.05) | 1.06<br>(0.37-3.08)                | <b>1.70</b><br><b>(1.04-2.77)</b> | 1.56<br>(0.88-2.78)               |
| Pregnancy-related hypertension     | n=415              | n=1024    | n=1173 | n=52                | n=107               | n=44                | n=25                               | n=136                             | n=107                             |
| aOR (95% CI)                       | ref.               | ref.      | ref.   | 0.86<br>(0.29-2.55) | 0.58<br>(0.26-1.29) | 1.26<br>(0.44-3.64) | <b>4.24</b><br><b>(1.64-10.94)</b> | 0.74<br>(0.39-1.42)               | <b>2.14</b><br><b>(1.20-3.84)</b> |

\*All models have been adjusted for maternal age and educational attainment. Bolded format indicates statistically significant difference ( $\alpha=0.05$ ) between multiple job holders and single job holders in the same stratum.
